# Supplementary material for: A meta-analysis of the association between male dimorphism and fitness outcomes in humans
Source: eLife journal article supplement (doi:10.7554/elife.65031), 2022-02-18
Supplement: supp [file elife-65031-supp-v1.zip]

Archive with 8 entries (8 files):
- elife_poa_e65031_Transparent_Reporting_File.pdf
- elife_poa_e65031_Supplementary_file_1.docx
- elife_poa_e65031_Supplementary_file_2.docx
- elife_poa_e65031_Supplementary_file_3.docx
- elife_poa_e65031_Supplementary_file_4.docx
- elife_poa_e65031_Supplementary_file_5.docx
- elife_poa_e65031_Supplementary_file_6.docx
- elife_poa_e65031_Supplementary_file_7.docx
