# Supplementary material for: A meta-analysis of the association between male dimorphism and fitness outcomes in humans
Source: eLife journal article supplement (doi:10.7554/elife.65031), 2022-02-18
Supplement: supp [file elife-65031-supp-v1.zip › elife_poa_e65031_Supplementary_file_6.docx]

Supplementary File 6A

*
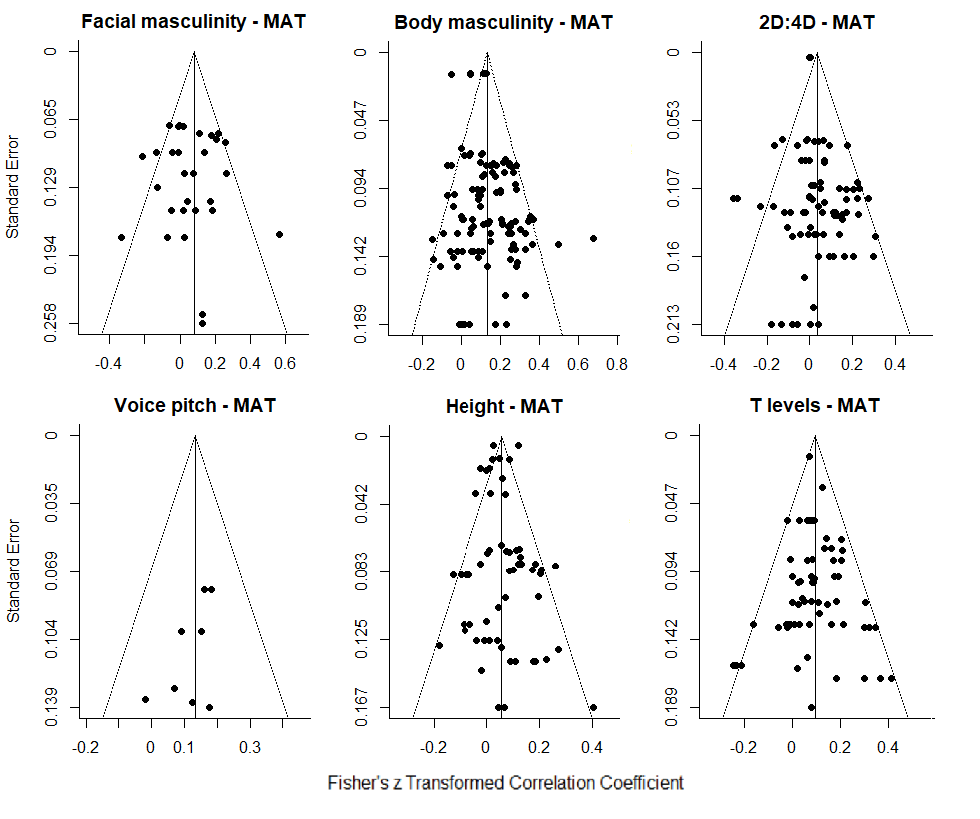
*

Funnel plots of effect sizes for mating measures (MAT). T = testosterone.

Supplementary File 6B


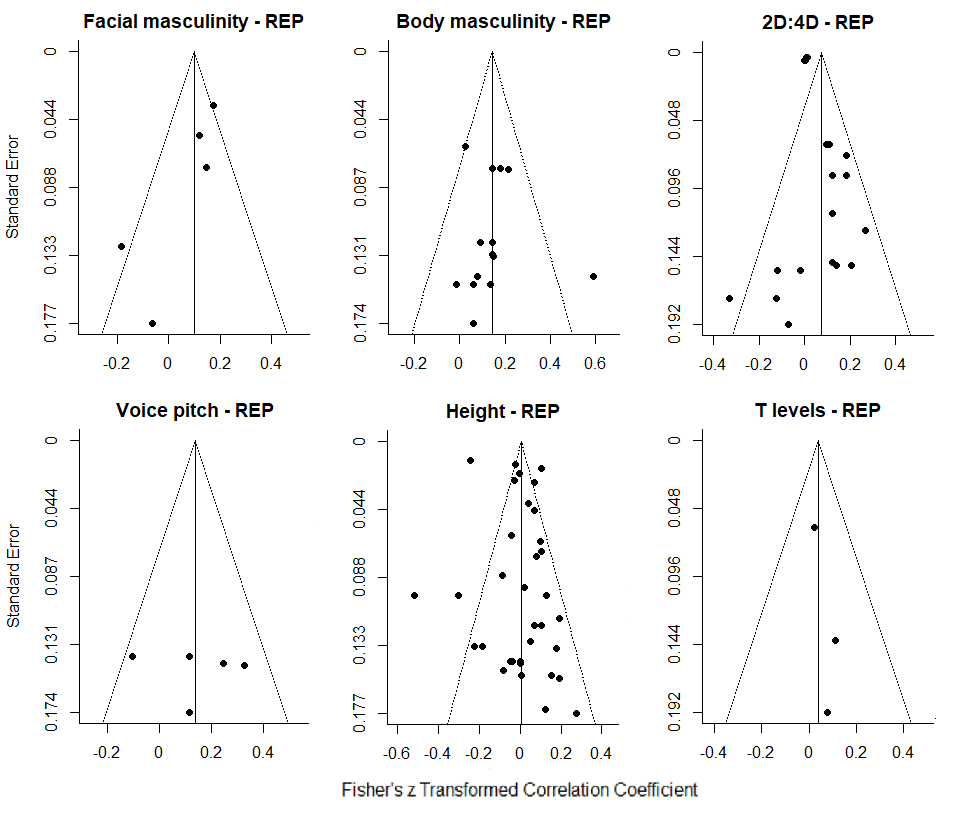


Funnel plots of effect sizes for reproductive measures (REP). T = testosterone levels.
