# Supplementary material for: A meta-analysis of the association between male dimorphism and fitness outcomes in humans
Source: eLife journal article supplement (doi:10.7554/elife.65031), 2022-02-18
Supplement: supp [file elife-65031-supp-v1.zip › elife_poa_e65031_Supplementary_file_7.docx]

Supplementary File 7

*Output for q-value computation for all analyses*
