# Supplementary material for: A meta-analysis of the association between male dimorphism and fitness outcomes in humans
Source: eLife journal article supplement (doi:10.7554/elife.65031), 2022-02-18
Supplement: supp [file elife_poa_e65031_Supplementary_file_1.docx]

Supplementary File 1

*Effect size conversion formulas*

| Kendall’s tau | r = sin (.5 πτ) (Kendall, 1970) |
| --- | --- |
| Spearman's rho | not converted |
| t | rYλ = √(t2 / (t2 + df)) Online converter: <https://www.uccs.edu/lbecker/> |
| Odds ratio | Online converter: http://escal.site/ |
| Unstandardized regression coefficient (B) | β = (S.D. of predictor/S.D. of outcome) × B; r = .98β + .05λ (λ = 1 when β is nonnegative and 0 when β is negative) |
| Standardized regression coefficient (β) | r = .98β + .05λ (λ = 1 when β is nonnegative and 0 when β is negative; Peterson & Brown, 2005) |
